# Supplementary material
Source: PubMed Central journal article supplement (PMC2635550)
Supplement: NIHMS2714-supplement-supp.pdf [file NIHMS2714-supplement-supp.pdf]

**Supplementary Table 1 Analysis of the novel SNPs identified from resequencing in type 1 diabetes**

| <b>SNP</b>                 | <b>MAF in controls</b> | <b>Cases <i>N</i></b> | <b>Controls <i>N</i></b> | <b>OR (95% c.i.)</b> | <b><i>P</i><br/>(1-d.f. test)</b> | <b><math>r^2</math><br/>with rs763361</b> | <b>D'</b> |
|----------------------------|------------------------|-----------------------|--------------------------|----------------------|-----------------------------------|-------------------------------------------|-----------|
| ss102661466<br>(Ala279Leu) | 0.065                  | 7,583                 | 7,185                    | 1.15 (1.05-1.26)     | $2.08 \times 10^{-3}$             | 0.07                                      | 0.95      |
| ss102661465<br>(Gln282Gln) | 0.078                  | 7,176                 | 6,759                    | 0.90 (0.82-0.99)     | 0.0298                            | 0.07                                      | 0.99      |

A multiplicative allelic effects model was assumed (see methods), as it was not significantly different from the full genotype model. OR is reported for the minor allele. MAF = minor allele frequency, *P* = *P* value, *N* = number, OR = odds ratio, 95% c.i. = 95% confidence interval,  $r^2$  = correlation coefficient, D' = Lewontin's  $D'^{28}$

**Supplementary Table 2 Analysis of *CD226* tag SNPs in type 1 diabetes (restricted to individuals with genotype information available for all single nucleotide polymorphisms)**

| <b>rs number</b> | <b>MAF in controls</b> | <b><i>P</i><br/>(1-d.f. test)</b> | <b>OR (95% c.i.)</b> | <b><i>N</i><br/>(cases)</b> | <b><i>N</i><br/>(controls)</b> |
|------------------|------------------------|-----------------------------------|----------------------|-----------------------------|--------------------------------|
| rs763361         | 0.46                   | 8.67 x 10 <sup>-8</sup>           | 1.19 (1.12 - 1.28)   | 3,606                       | 4,092                          |
| rs1009847        | 0.28                   | 8.48 x 10 <sup>-3</sup>           | 1.10 (1.02 - 1.18)   | 3,606                       | 4,092                          |
| rs1124980        | 0.38                   | 2.06 x 10 <sup>-5</sup>           | 1.15 (1.08 - 1.23)   | 3,606                       | 4,092                          |
| rs11661553       | 0.44                   | 9.36 x 10 <sup>-7</sup>           | 0.85 (0.79 - 0.91)   | 3,606                       | 4,092                          |
| rs12604328       | 0.26                   | 1.40 x 10 <sup>-4</sup>           | 1.15 (1.07 - 1.24)   | 3,606                       | 4,092                          |
| rs17208329       | 0.24                   | 0.033                             | 1.09 (1.01 - 1.17)   | 3,606                       | 4,092                          |
| rs17842596       | 0.38                   | 6.38 x 10 <sup>-5</sup>           | 1.14 (1.07 - 1.22)   | 3,606                       | 4,092                          |
| rs1788114        | 0.42                   | 4.04 x 10 <sup>-4</sup>           | 1.13 (1.05 - 1.20)   | 3,606                       | 4,092                          |
| rs1788234        | 0.39                   | 2.75 x 10 <sup>-3</sup>           | 1.11 (1.04 - 1.18)   | 3,606                       | 4,092                          |
| rs4891781        | 0.40                   | 7.97 x 10 <sup>-4</sup>           | 1.12 (1.05 - 1.20)   | 3,606                       | 4,092                          |

A multiplicative allelic effects model was assumed (see materials and methods), as it was not significantly different from the full genotype model. OR is reported for the minor allele

MAF = minor allele frequency, OR = odds ratio, 95% c.i. = 95% confidence interval,

rs17208112, a SNP only tagging itself, failed quality control checks and was therefore excluded in the analysis

**Supplementary Table 3 Analysis of *CD226* tag SNPs in multiple sclerosis (restricted to individuals with genotype information available for all single nucleotide polymorphisms)**

| rs number  | Cases and controls |                        |                    |                  |                     |                 |                        |                    |                  |                     |
|------------|--------------------|------------------------|--------------------|------------------|---------------------|-----------------|------------------------|--------------------|------------------|---------------------|
|            | USA                |                        |                    |                  |                     | UK              |                        |                    |                  |                     |
|            | MAF in controls    | <i>P</i> (1-d.f. test) | OR (95% c.i.)      | <i>N</i> (cases) | <i>N</i> (controls) | MAF in controls | <i>P</i> (1-d.f. test) | OR (95% c.i.)      | <i>N</i> (cases) | <i>N</i> (controls) |
| rs763361   | 0.46               | 0.033                  | 1.17 (1.01 – 1.35) | 1,143            | 545                 | 0.46            | 0.011                  | 1.14 (1.03 – 1.26) | 933              | 3,606               |
| rs1009847  | 0.25               | 0.014                  | 1.23 (1.04 - 1.44) | 1,143            | 545                 | 0.28            | 0.20                   | 1.08 (0.96 - 1.20) | 933              | 3,606               |
| rs1124980  | 0.38               | 0.025                  | 1.18 (1.02 - 1.37) | 1,143            | 545                 | 0.38            | 0.046                  | 1.11 (1.00 - 1.23) | 933              | 3,606               |
| rs11661553 | 0.42               | 0.18                   | 0.91 (0.78 - 1.05) | 1,143            | 545                 | 0.44            | 0.10                   | 0.92 (0.83 - 1.02) | 933              | 3,606               |
| rs12604328 | 0.26               | 0.11                   | 1.14 (0.97 - 1.35) | 1,143            | 545                 | 0.26            | 0.14                   | 1.09 (0.97 - 1.22) | 933              | 3,606               |
| rs17208329 | 0.20               | 0.11                   | 1.15 (0.97 - 1.38) | 1,143            | 545                 | 0.24            | 0.48                   | 1.04 (0.93 - 1.18) | 933              | 3,606               |
| rs17842596 | 0.38               | 0.098                  | 1.13 (0.98 - 1.31) | 1,143            | 545                 | 0.38            | 0.33                   | 1.05 (0.95 - 1.17) | 933              | 3,606               |
| rs1788114  | 0.44               | 0.22                   | 1.09 (0.95 - 1.26) | 1,143            | 545                 | 0.42            | 0.13                   | 1.08 (0.98 - 1.20) | 933              | 3,606               |
| rs1788234  | 0.38               | 0.032                  | 1.18 (1.01 - 1.36) | 1,143            | 545                 | 0.39            | 0.10                   | 1.09 (0.98 - 1.21) | 933              | 3,606               |
| rs4891781  | 0.38               | 0.027                  | 1.18 (1.02 - 1.37) | 1,143            | 545                 | 0.40            | 0.18                   | 1.07 (0.97 - 1.19) | 933              | 3,606               |

A multiplicative allelic effects model was assumed (see methods), as it was not significantly different from the full genotype model. OR is reported for the minor allele  
MAF = minor allele frequency, *P* = *P* value, OR = odds ratio, 95% c.i. = 95% confidence interval, *N* = number

**Supplementary Table 4 Separate analysis of Gly307Ser in autoimmune thyroid disease subgroups: Graves' disease and Hashimoto's disease**

| Disease                            | Cohort            | MAF in controls | <i>P</i> (1-d.f. test) | OR (95% c.i.)    | <i>P</i> combined | <i>N</i> (trios) | <i>N</i> (cases) | <i>N</i> (controls) |
|------------------------------------|-------------------|-----------------|------------------------|------------------|-------------------|------------------|------------------|---------------------|
| Graves' disease <sup>I</sup>       | UK (case/control) | 0.47            | 0.0182                 | 1.10 (1.02-1.20) | -                 | 2,137            | 3,511            |                     |
| Graves' disease <sup>II</sup>      | UK (case/control) | 0.47            | 0.0382                 | 1.08 (1.00-1.16) | -                 | 2,295            | 5,431            |                     |
| Hashimoto's disease <sup>III</sup> | UK (case/control) | 0.47            | 0.367                  | 1.05 (0.94-1.19) | -                 | 663              | 5,431            |                     |

A multiplicative allelic effects model was assumed (see methods), as it was not significantly different from the full genotype model. OR is reported for the minor allele

MAF = minor allele frequency, *P* = *P* value, OR = odds ratio, 95% c.i. = 95% confidence interval, *N* = number

<sup>I</sup>Original Graves' disease samples reported in Nature Genetics<sup>17</sup>

<sup>II</sup>Additional 158 Graves' disease cases and 1,920 controls

<sup>III</sup>Hashimoto's disease samples
